# Supplementary material for: Cryptosporidium parvum-induced ileo-caecal adenocarcinoma and Wnt signaling in a mouse model
Source: PubMed Central journal article supplement (PMC4036476; doi:10.1242/dmm.013292), 2014-03-20
Supplement: supp_7.6.693_DMM013292.pdf [file supp_7.6.693_DMM013292.pdf]

**Table S1. List of corresponding primer pairs for 16 amplicons representing *Apc*,  $\beta$ -catenin, and *Kras***

| Name        | Sens    | ID GenBank, position             | Sequence                  | Length | Tm(°C) |
|-------------|---------|----------------------------------|---------------------------|--------|--------|
| APC A       | forward | NC_000084.6: 34312278-34312296   | tcccggctcaagtctgcca       | 19     | 60,7   |
| APC A       | reverse | NC_000084.6: 34312690-34312709   | gctatctgggctcagtggt       | 20     | 59,4   |
| APC B       | forward | NC_000084.6:34312689-34312709    | taccactgcagcccagatagc     | 21     | 58,7   |
| APC B       | reverse | NC_000084.6: 34313042-34313062   | gggctaggtcagctggatact     | 21     | 57,8   |
| APC C       | forward | NC_000084.6: 34313041-34313062   | cagtatccagctgacctagccc    | 22     | 58,8   |
| APC C       | reverse | NC_000084.6: 34313254-34313278   | agacaggataactggtgtctggct  | 25     | 59,1   |
| APC D       | forward | NC_000084.6: 34313254-34313278   | agccagaacaccagttatcctgtct | 25     | 59,1   |
| APC D       | reverse | NC_000084.6: 34313734-34313756   | gctgaacttgacgcagctgatt    | 23     | 60     |
| APC E       | forward | NC_000084.6: 34313734-34313756   | aatcagctcgtccaagttcagc    | 23     | 60     |
| APC E       | reverse | NC_000084.6: 34314176-34314195   | gagcggagtctcctggacat      | 20     | 58,1   |
| APC F       | forward | NC_000084.6: 34314176-34314199   | atgtccaggagactccgctcgtat  | 24     | 60,5   |
| APC F       | reverse | NC_000084.6: 34314466-34314485   | accctctgcacggcagcatt      | 20     | 61,6   |
| <i>Kras</i> | forward | NC_000072.6: 145247097-145247077 | cctttgagagccattagctgc     | 21     | 56,2   |
| <i>Kras</i> | reverse | NC_000072.6: 145246708-145246687 | agcgttacctctatcgtagggt    | 22     | 56,2   |
| beta-cat    | forward | NC_000075.6: 120950465-120950490 | cgtagatggcttctcaggtagcatt | 26     | 58,2   |
| beta-cat    | reverse | NC_000075.6: 120950787-120950807 | gctgtcacacagccctgtcaa     | 21     | 59,7   |
